# Supplementary material for: Impact of the heterogeneity of the sandy Opalinus clay facies at the Mont Terri underground research laboratory on radionuclide migration
Source: Copernicus journal article supplement (doi:10.5194/sand-1-141-2021), 2021-11-10
Supplement: Supplementary file 1 [file sand-1-141-2021-supplement.pdf]

Supplement of Saf. Nucl. Waste Disposal, 1, 141–142, 2021  
<https://doi.org/10.5194/sand-1-141-2021-supplement>  
© Author(s) 2021. CC BY 4.0 License.

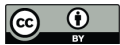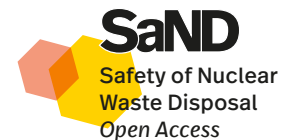

*Supplement of*

## **Impact of the heterogeneity of the sandy Opalinus clay facies at the Mont Terri underground research laboratory on radionuclide migration**

**Naila Ait-Mouheb et al.**

*Correspondence to:* Naila Ait-Mouheb ([n.ait.mouheb@fz-juelich.de](mailto:n.ait.mouheb@fz-juelich.de))

The copyright of individual parts of the supplement might differ from the article licence.



Naila Ait-Mouheb<sup>1,\*</sup>, Luc R. Van Loon<sup>2</sup>, Martin A. Glaus<sup>2</sup>, Yuankai Yang<sup>1</sup>,  
Guido Deissmann<sup>1</sup>, Dirk Bosbach<sup>1</sup>

<sup>1</sup>Institute of Energy and Climate Research – IEK-6, Forschungszentrum Jülich GmbH, 52425 Jülich – Germany

<sup>2</sup>Laboratory for Waste Management, Paul Scherrer Institut, CH-5232 Villigen PSI – Switzerland

## Background / Objectives

- Within the site selection procedure for a repository for heat-generating, high-level radioactive wastes, the site with the "best-possible safety" is to be determined in a multi-phased comparative process.
- Potential host rocks for nuclear waste repositories are heterogeneous on various scales, ranging from nano-scale to kilometer-scale.
- Objective: Evaluation of the effects of structural and mineralogical heterogeneity of a clay host rock on <sup>226</sup>Ra (half-life 1600 years) migration using sandy Opalinus Clay (OPA) facies as example.

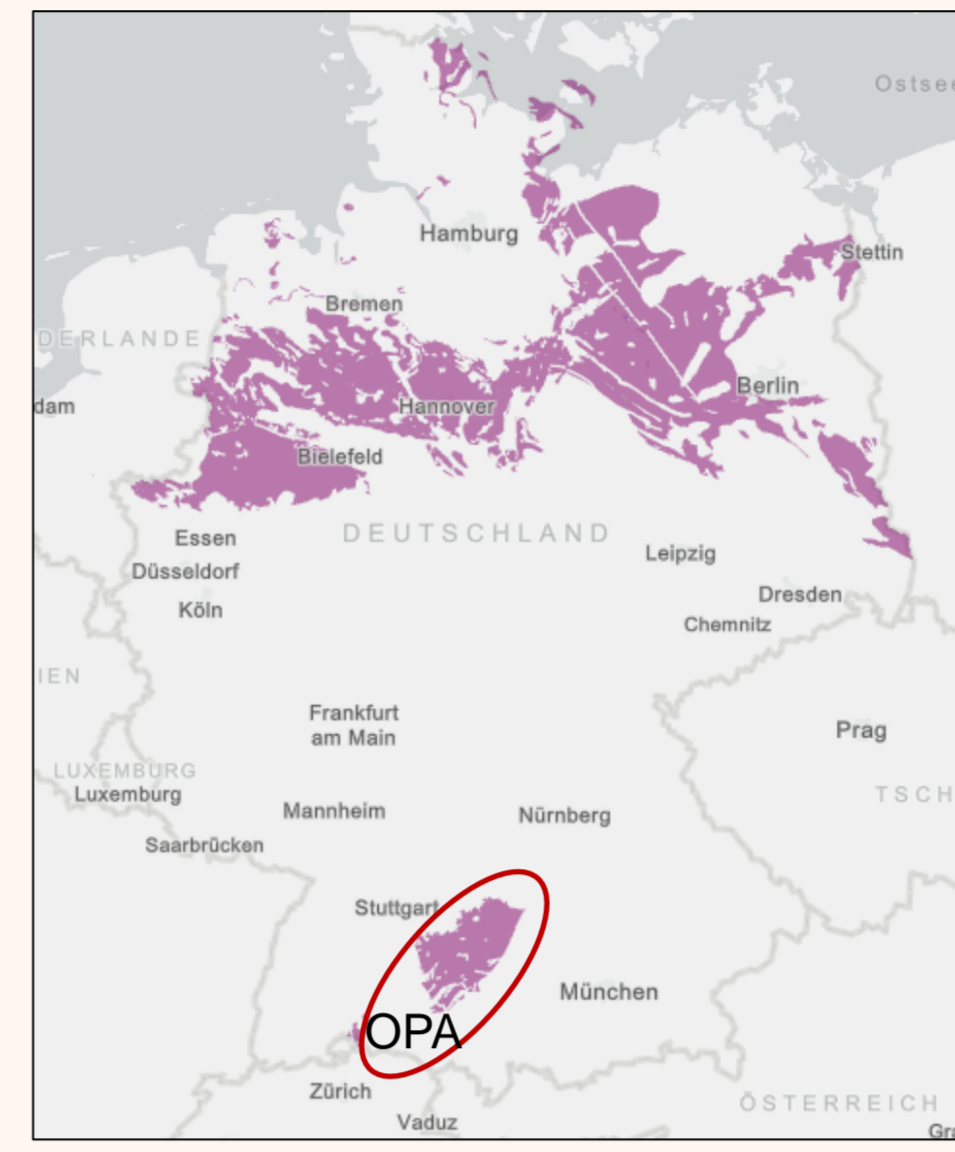

Pretertiary clay rocks identified in the "Zwischenbericht Teilgebiete" (www.bge.de)

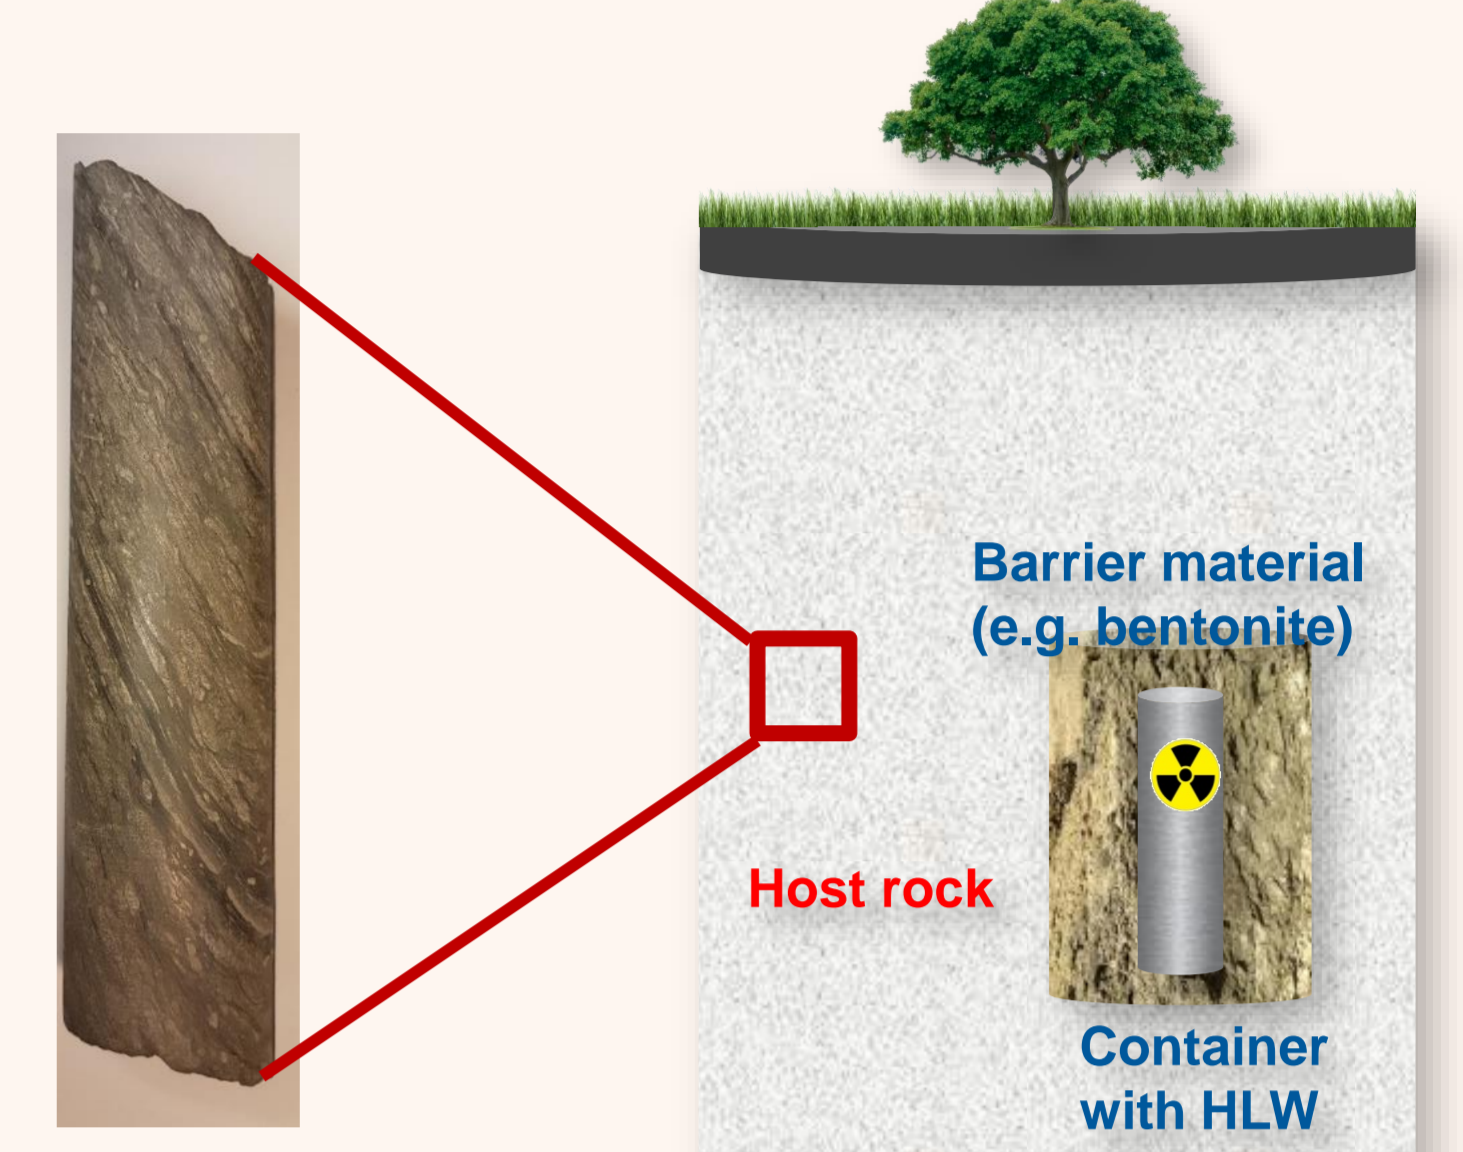

Drill core extracted from Mont Terri underground laboratory

## Tools / Methods

### Chemical / structural characterization:

e.g., XRD, SEM-EDX, N<sub>2</sub>-BET, quantitative Rietveld phase analysis using GSAS-II software.

### Determination of transport parameters:

Determination of HTO effective diffusion coefficient  $D_e$  and HTO connected porosity  $\varepsilon_c$  using diffusion cells [1].

### Sorption experiments (<sup>226</sup>Ra):

Batch sorption experiments with different samples representative of the heterogeneity of the drill cores, S/L ratio = 117 g·L<sup>-1</sup>, <sup>226</sup>Ra analysis by liquid scintillation counting (LSC).

### Modelling sorption data (bottom-up approach):

Phreeqc 3.6 [2] assuming that illite and illite/smectite mixed layers are the main sorbing phases in the sandy OPA (cf. [3]).

### Blind reactive transport modelling of <sup>226</sup>Ra migration in sandy OPA

- ICP 1.6 [4], Phreeqc 3.6 [2], Comsol Multiphysics 5.5 [5],
- Thermochemie database V10a,
- Retention of <sup>226</sup>Ra is taken into account via cation exchange, surface complexation reactions and the formation of solid solutions of (Ra,Ba,Sr)-sulphates.

## Selected results

### Characterization of sandy OPA

Mineralogical composition (wt.%) of powdered samples representative of the heterogeneity of the core used in sorption experiments

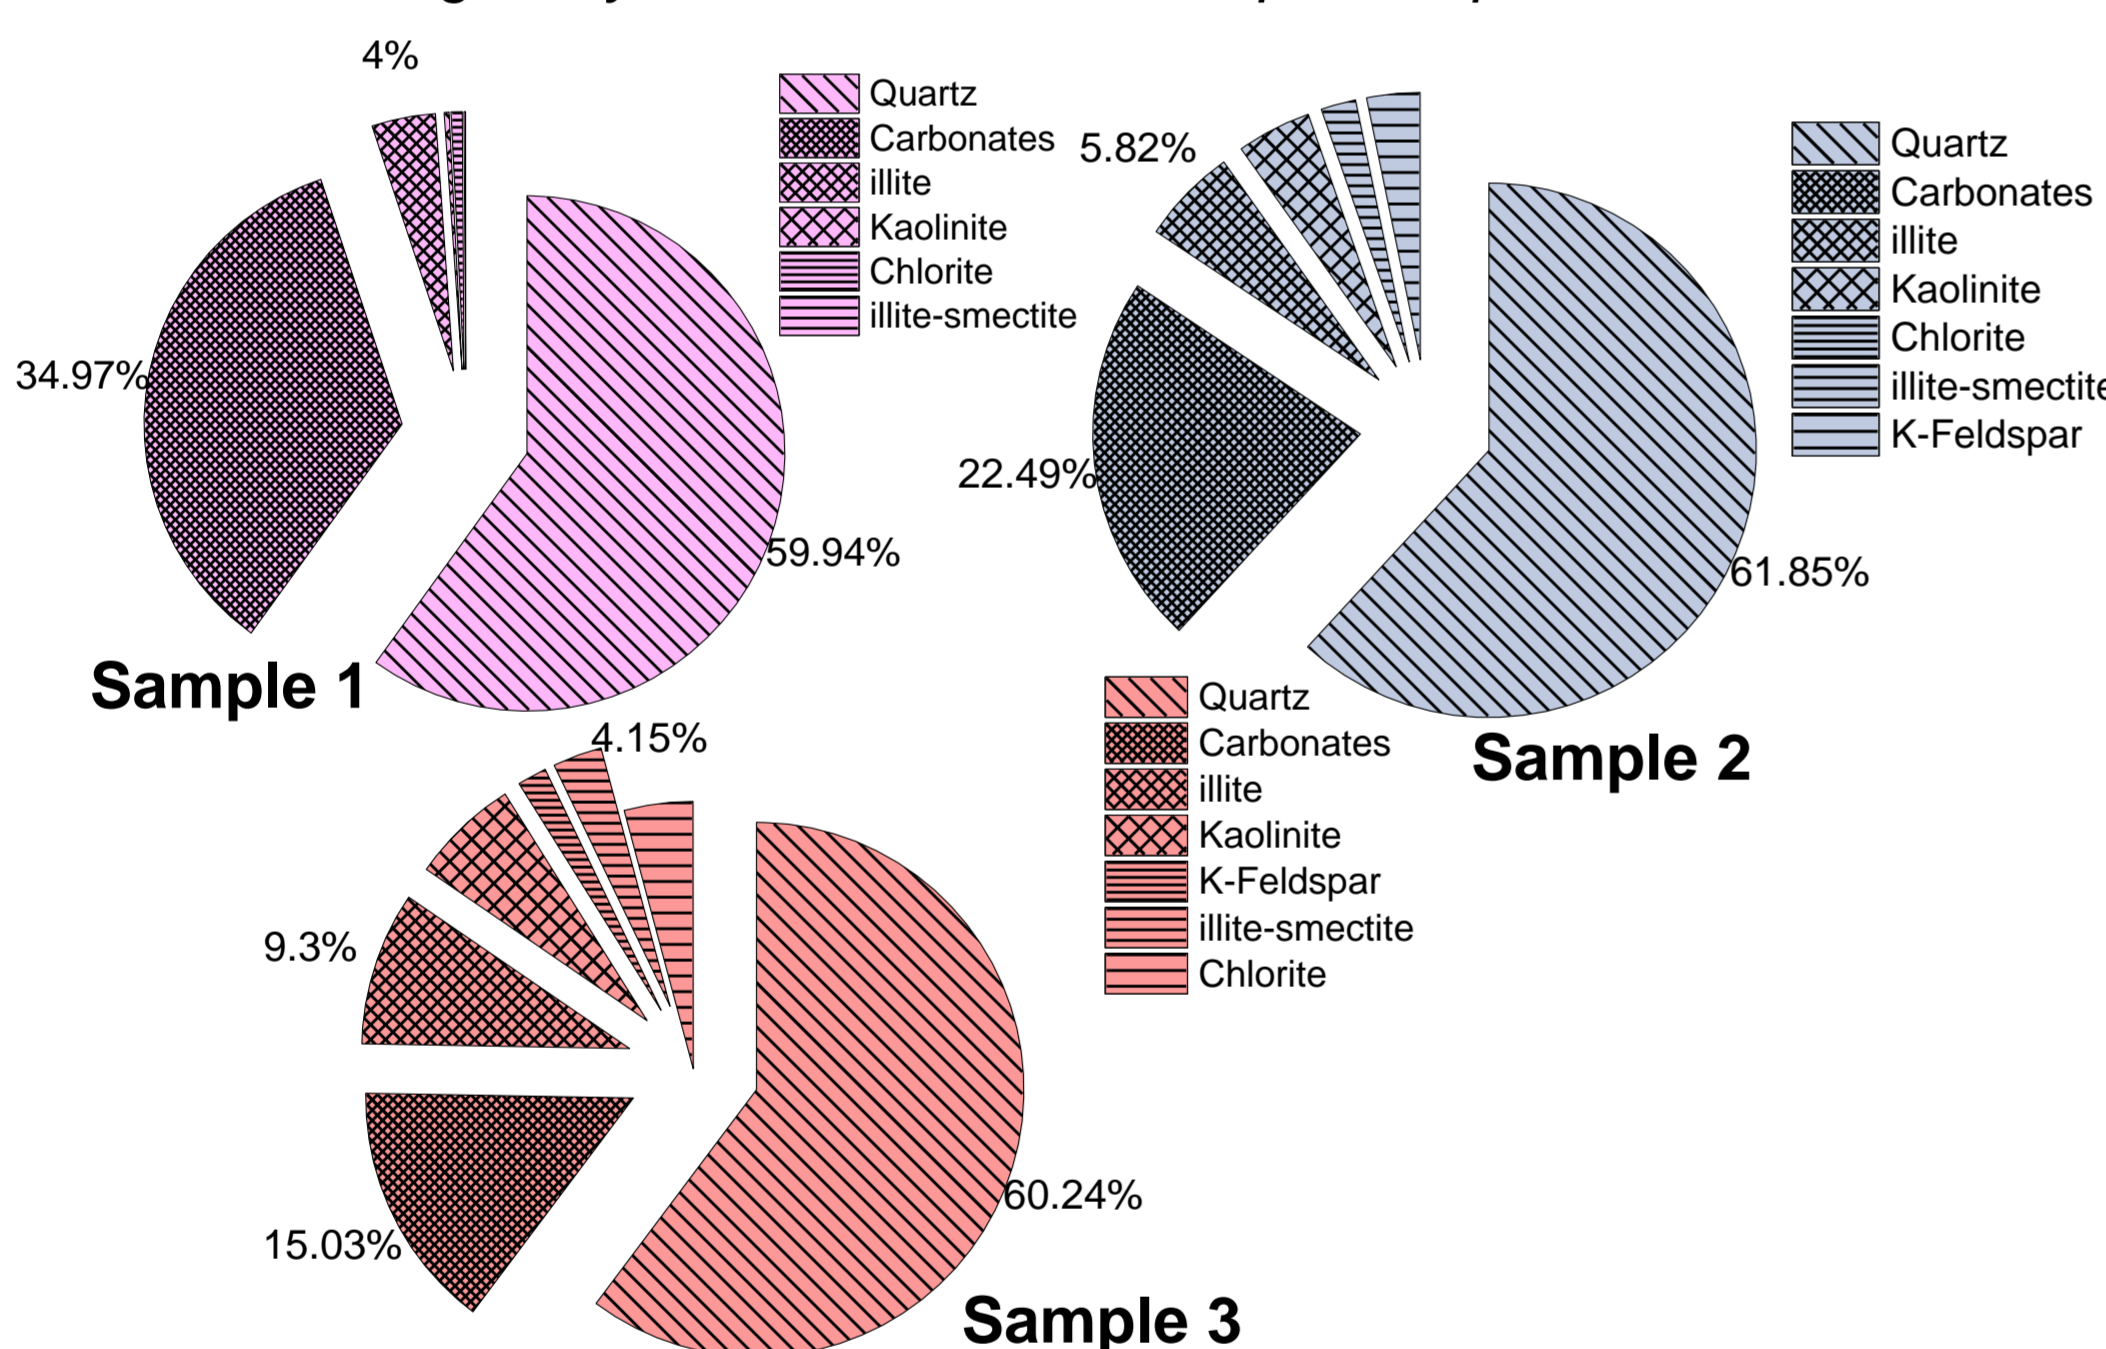

→ Minor phases: pyrite, siderite, feldspar, and rutile

→ (Ba, Sr) sulphate solid solutions embedded in clay matrix

### <sup>226</sup>Ra sorption on sandy OPA

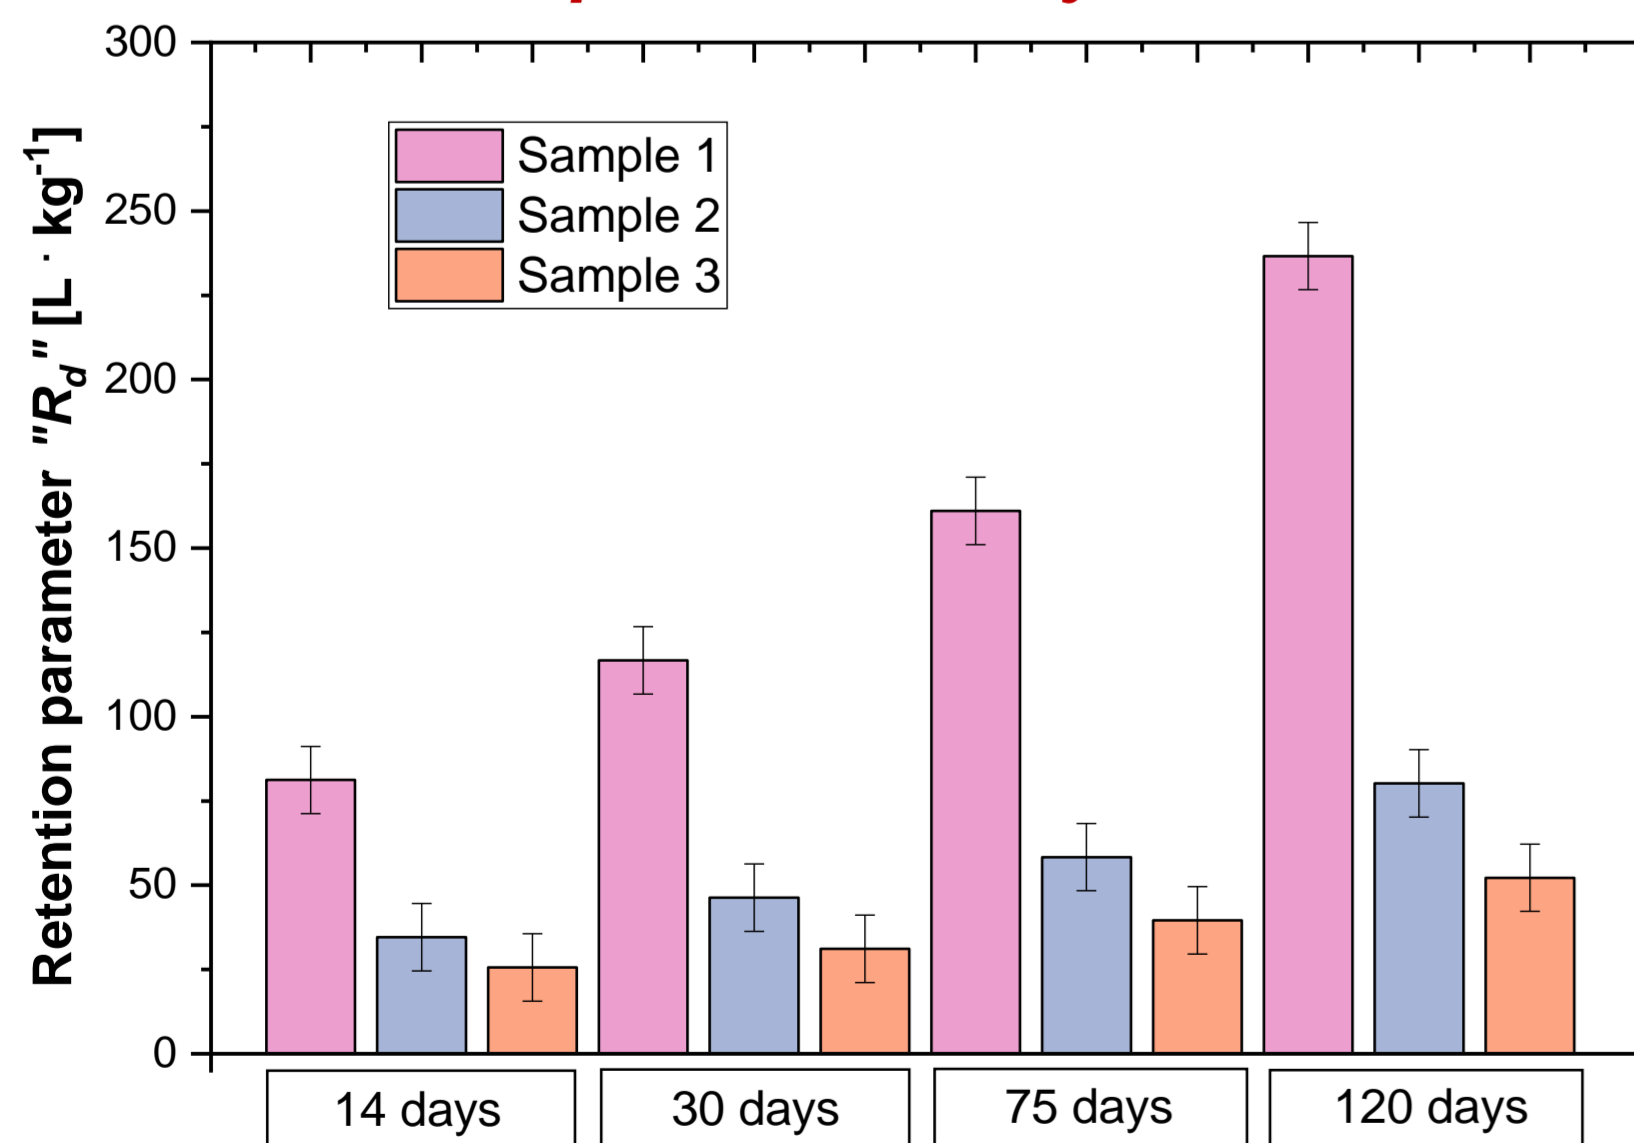

Duration of the experiments

Sorption of <sup>226</sup>Ra on samples selected from sandy OPA facies as a function of time (S/L ratio = 117 g L<sup>-1</sup>;  $c_0(\text{Ra}) \sim 10^{-9}$  mol·L<sup>-1</sup>).

→  $20 \text{ L} \cdot \text{kg}^{-1} < R_d(^{226}\text{Ra}) < 125 \text{ L} \cdot \text{kg}^{-1}$  (after 30 days)

→ Increase of <sup>226</sup>Ra retention over time and with increasing carbonate content

→ Diffusion or incorporation of <sup>226</sup>Ra into minerals (e.g., calcite) indicated

### <sup>226</sup>Ra sorption modelling (bottom-up approach)

| Surface complexation reaction                                                          | Reference |
|----------------------------------------------------------------------------------------|-----------|
| $\equiv \text{clay\_OH} + \text{Ra}^{2+} = \equiv \text{clay\_ORa}^{+} + \text{H}^{+}$ | [7]       |
| Cation exchange reaction                                                               |           |
| $2\text{Na}^{+} \text{clay} + \text{Ra}^{2+} = \text{Ra\_clay} + 2\text{Na}^{+}$       | [7]       |

- Site types, site capacities, and protolysis constants for illite [6]
- Parameters for <sup>226</sup>Ra sorption on pure clay phases [7]

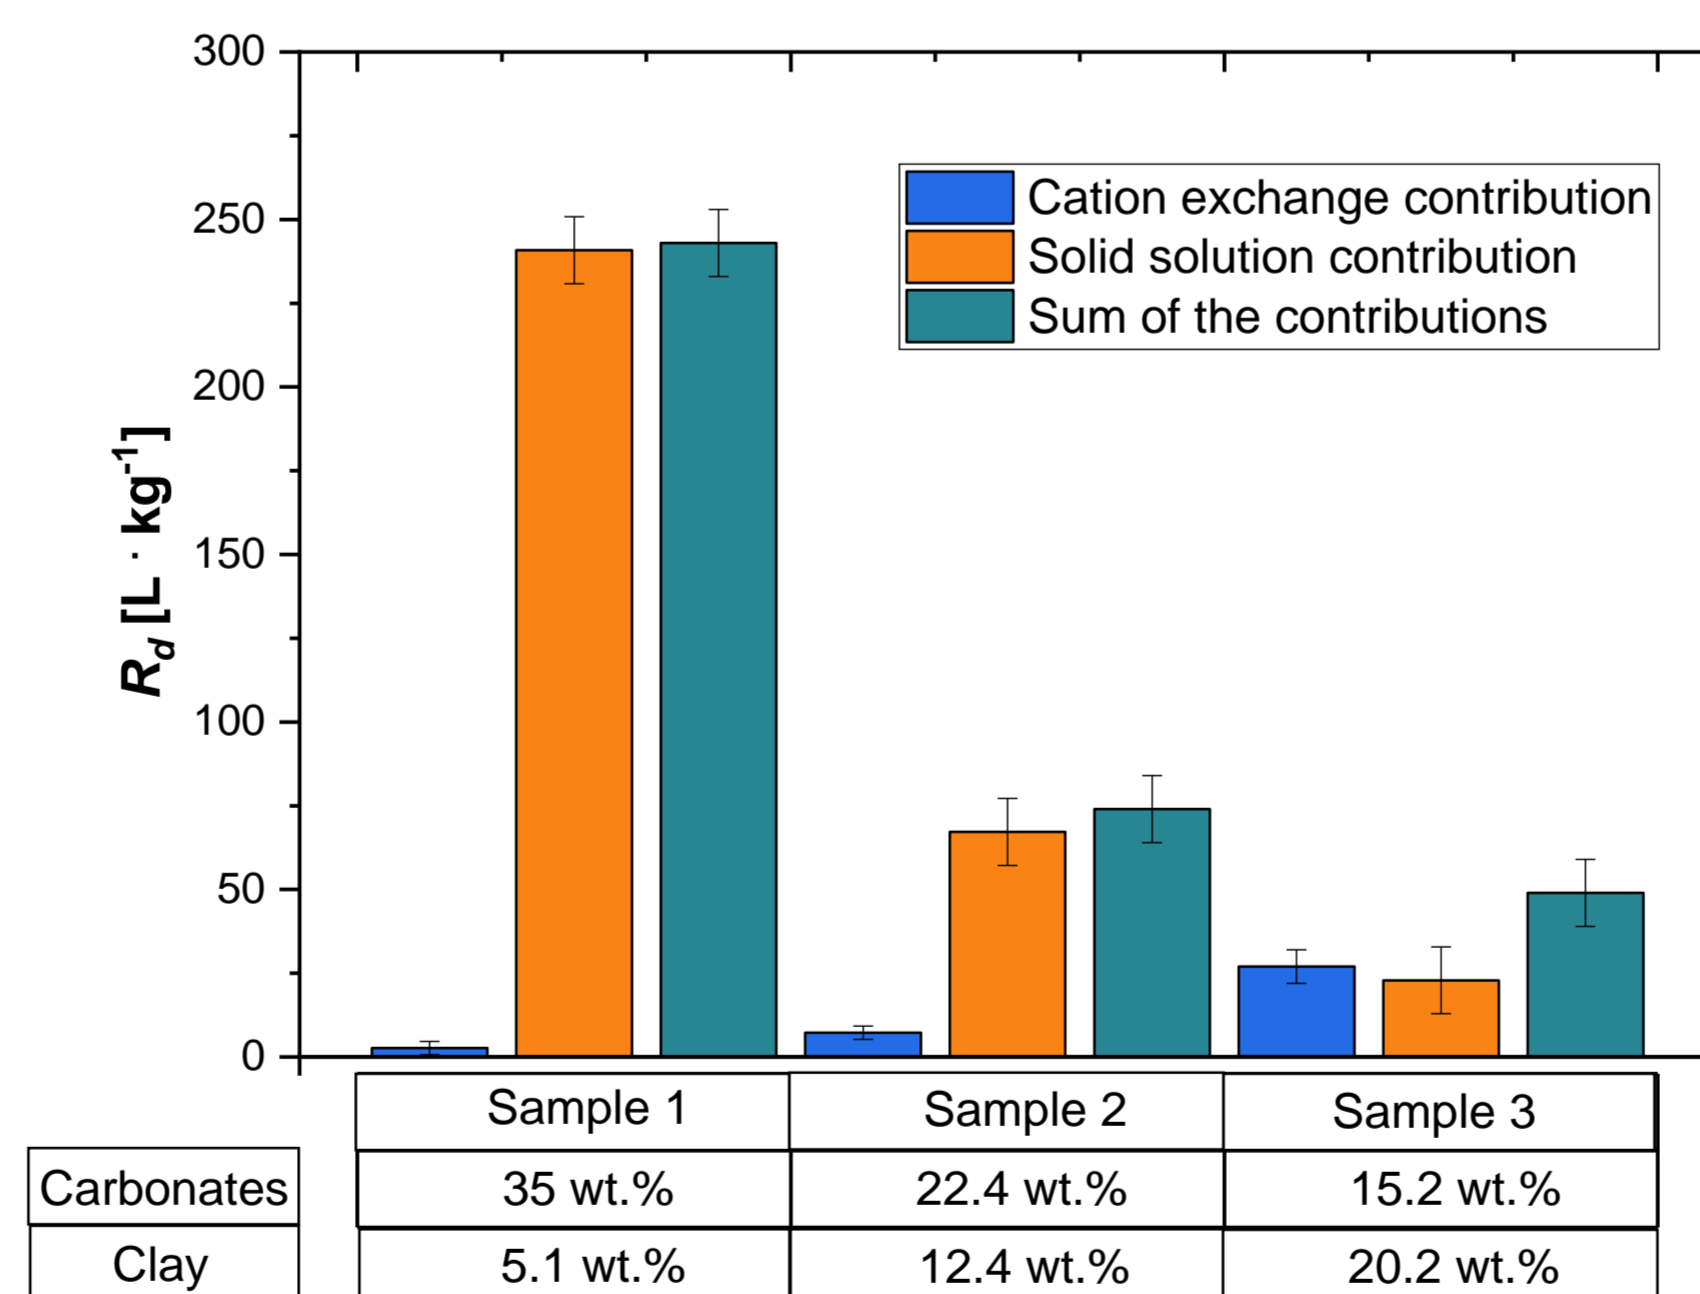

Different contributions to <sup>226</sup>Ra retention in sandy OPA after 120 days equilibration time

→ The results show a major contribution on <sup>226</sup>Ra retention due to formation of Ba–Sr–Ra carbonates and sulfate solid solutions and a smaller contribution due to surface complexation and cation exchange.

### Prediction of <sup>226</sup>Ra migration in sandy OPA

- Site types, site capacities, and protolysis constants for illite [6]
- Parameters for <sup>226</sup>Ra sorption on pure clay phases [7]
- Clay water saturated with calcite, dolomite, celestine and barite
- Boundary conditions: left → fixed concentration, right → closed

#### Clay layer:

- CEC =  $106 \cdot 10^{-3}$  eq kg<sup>-1</sup> OPA
- $D_e = 4 \cdot 10^{-11}$  m<sup>2</sup>/s, porosity  $\varepsilon = 0.16$  [8]

- (Ra,Ba,Sr)-sulphate solid solution formation in equilibrium with clay water

#### Carbonate/sand lens:

- Porosity  $\varepsilon = 0.08$  [9]
- $D_e = 2 \cdot 10^{-12}$  m<sup>2</sup>/s
- Different proportions of clay and carbonate/sand

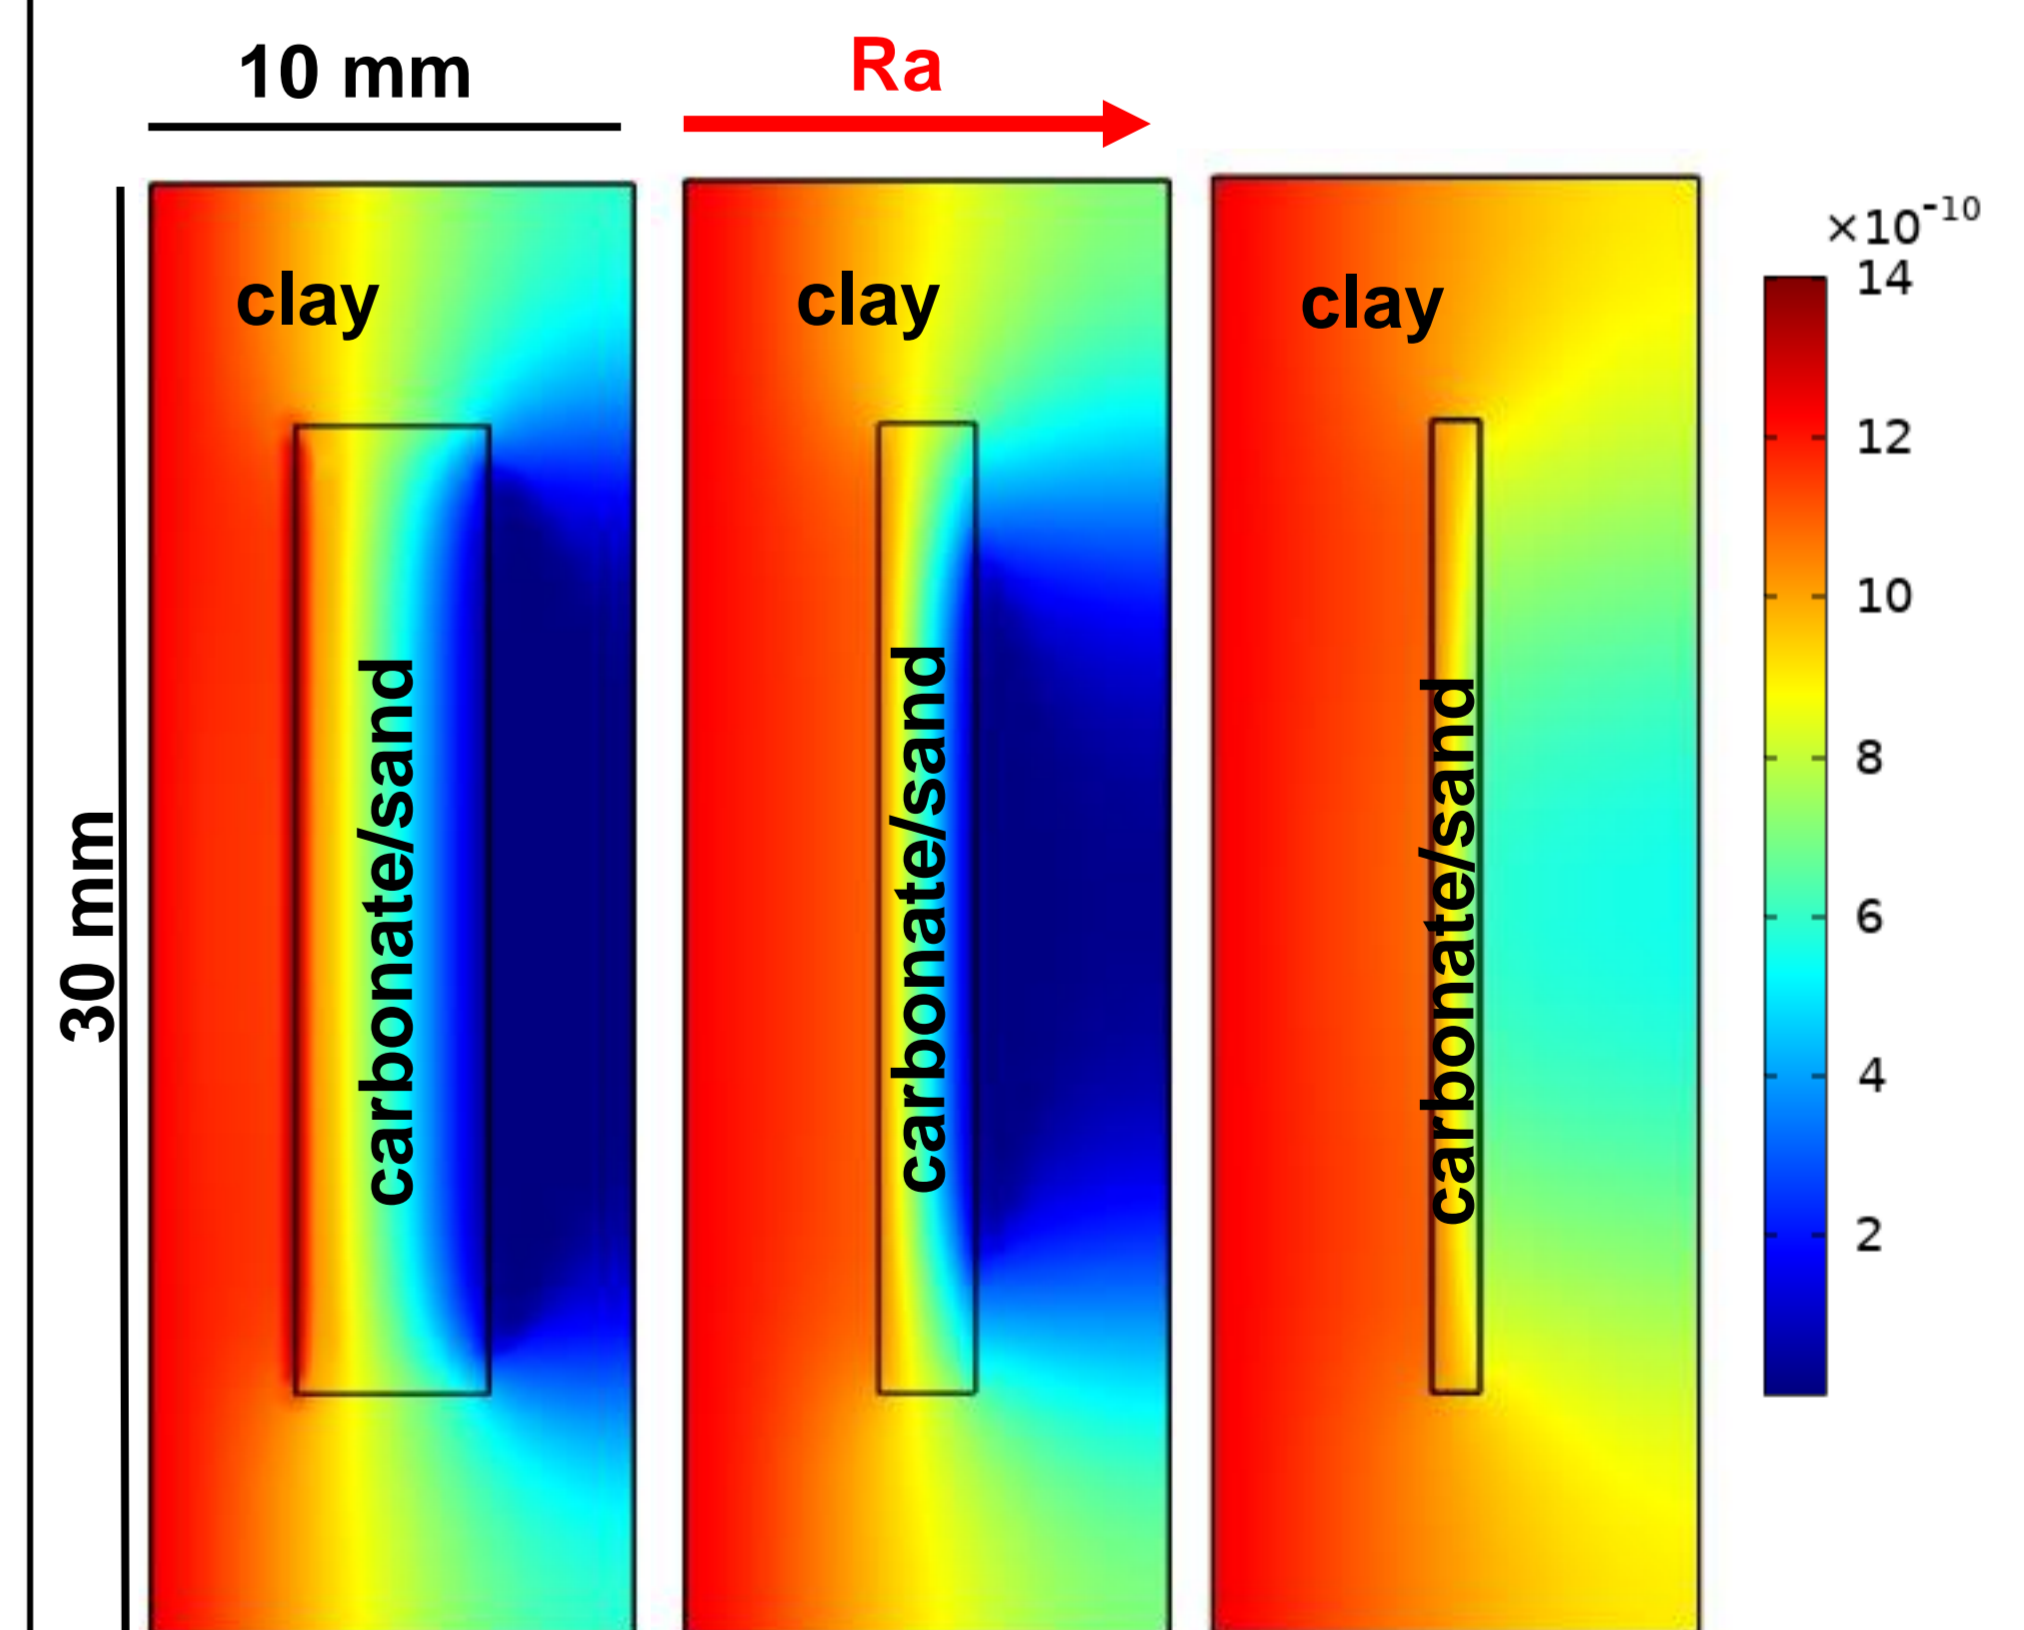

Modelled diffusion profiles of <sup>226</sup>Ra (mole/kg<sub>water</sub>) in sandy OPA after 10 days of in-diffusion.

→ The reactive transport model shows different diffusion profiles of <sup>226</sup>Ra as a function of carbonate/sand content

## Conclusions

### Characterization of sandy OPA samples

→ Heterogeneous composition with amounts of quartz, carbonates, and clay minerals varying from 58 to 65 wt.%, 13 to 35 wt.% and 5 to 25 wt.%, respectively.

### Sorption parameters

→ Increase of <sup>226</sup>Ra retention over time indicating

→ kinetically controlled sorption process.

→ Uptake of <sup>226</sup>Ra associated with cation exchange, surface complexation reactions, and

→ Formation of solid solutions of <sup>226</sup>Ra with (Ba, Sr)-sulphates and/or uptake by carbonate minerals.

→ Bottom-up approach for sorption modelling not applicable for <sup>226</sup>Ra in clay rocks with high carbonate content.

### Reactive transport model of Ra migration

→ The heterogeneity of OPA-SF affects the diffusive mass transport of <sup>226</sup>Ra.
